# Supplementary material for: A triple-synergistic strategy for combinational photo/radiotherapy and multi-modality imaging based on hyaluronic acid-hybridized polyaniline-coated WS2 nanodots
Source: Royal Society of Chemistry journal article supplement (doi:10.1039/c6nr09219e), 2017-01-01
Supplement: c6nr09219e1.pdf [file c6nr09219e1.pdf]

## Supporting Information

### **A Triple-Synergistic Strategy for Combinational Photo/Radiotherapy and Multi-Modality Imaging based on Hyaluronic Acid-Hybridized Polyaniline-Coated WS<sub>2</sub> Nanodots**

Jinping Wang, Xiaojuan Pang, Xiaoxiao Tan, Yilin Song, Li Liu, Qing You, Qi Sun, Fengping  
Tan, Nan Li\*

Tianjin Key Laboratory of Drug Delivery & High-Efficiency, School of Pharmaceutical Science  
and Technology, Tianjin University, 300072, Tianjin, PR China.

\*Corresponding author at: School of Pharmaceutical Science and Technology, Tianjin University,  
300072, Tianjin, PR China.

Tel.: +86-022-27404986

E-mail address: [linan19850115@163.com](mailto:linan19850115@163.com)

## Figures

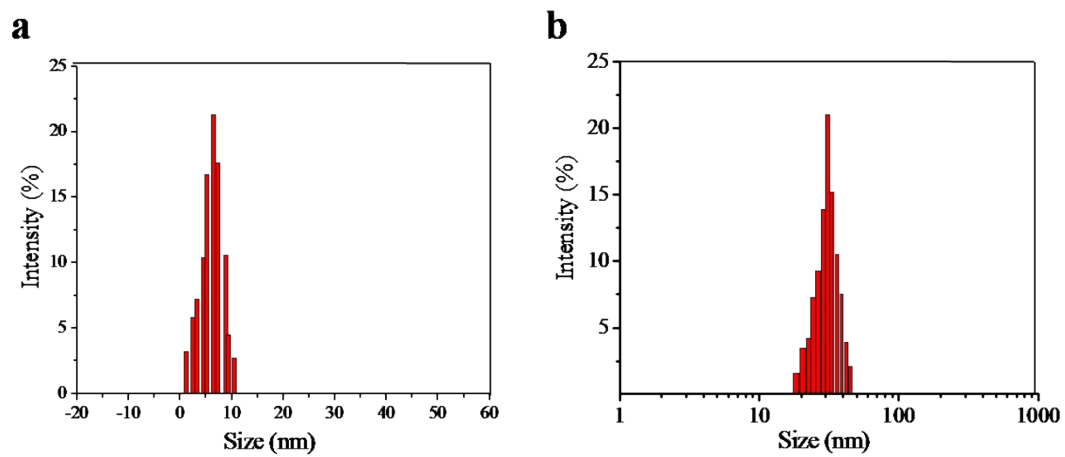

**Fig. S1** Size distribution of (a)  $\text{WS}_2$  nanodots and (b)  $\text{HA-WS}_2@PANI/\text{Ce6}$  nanohybrids.

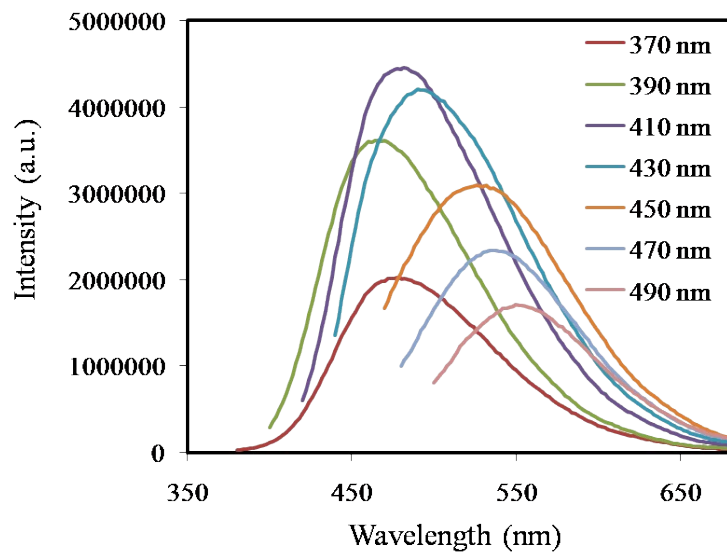

**Fig. S2** Fluorescence spectra of WS<sub>2</sub> nanodots in water.

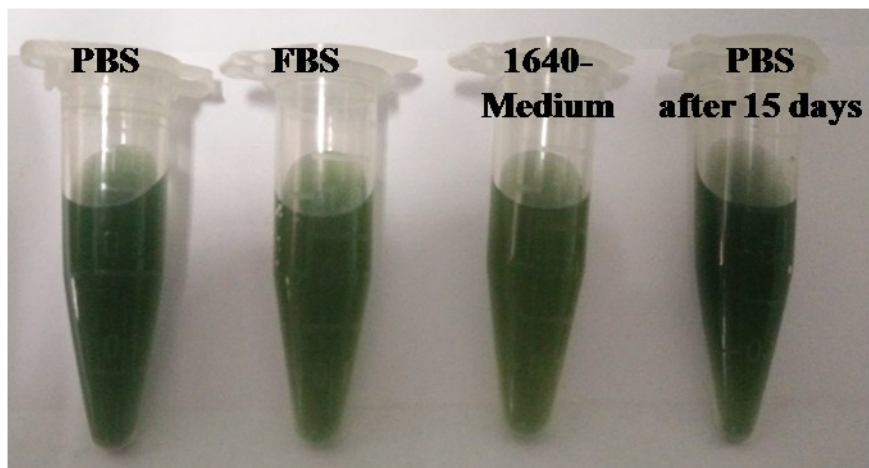

**Fig. S3** Photos of HA-WS<sub>2</sub>@PANI/Ce6 nanoparticles in PBS, RPMI-1640 cell culture medium, fetal bovine serum (FBS), and in PBS after 15 days.

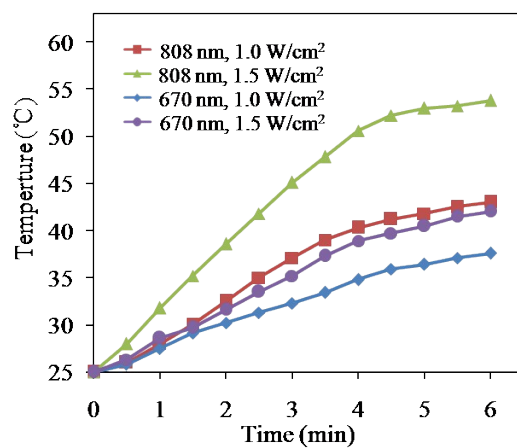

**Fig. S4** Temperature evolution curves of HA-WS<sub>2</sub>@PANI/Ce6 nanohybrids (0.1 mg ml<sup>-1</sup>) over a period of 6 min following exposure to different power of 808 nm or 670 nm laser irradiation.

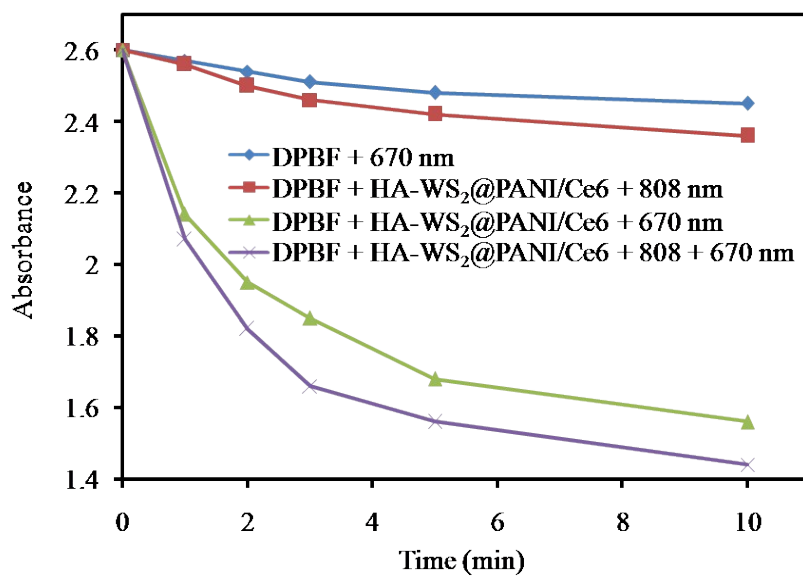

**Fig. S5** Normalized absorbance of DPBF at 410 nm during photodecomposition by ROS generation in the presence of HA-WS<sub>2</sub>@PANI/Ce6 nanoparticles under different laser irradiation.

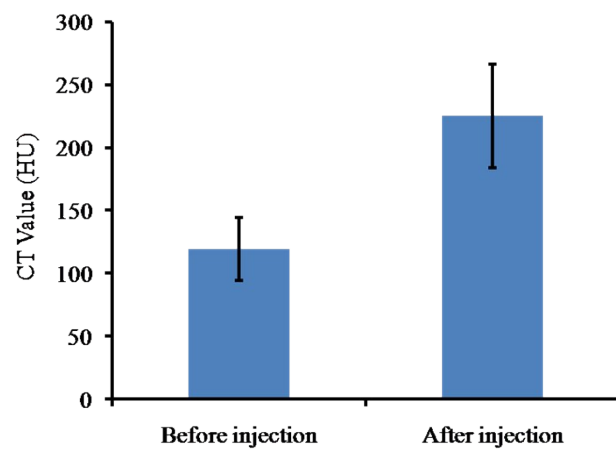

**Fig. S6** Corresponding HU value of HA-WS<sub>2</sub>@PANI/Ce6 nanohybrids in the tumor before injection and 8 h after injection.

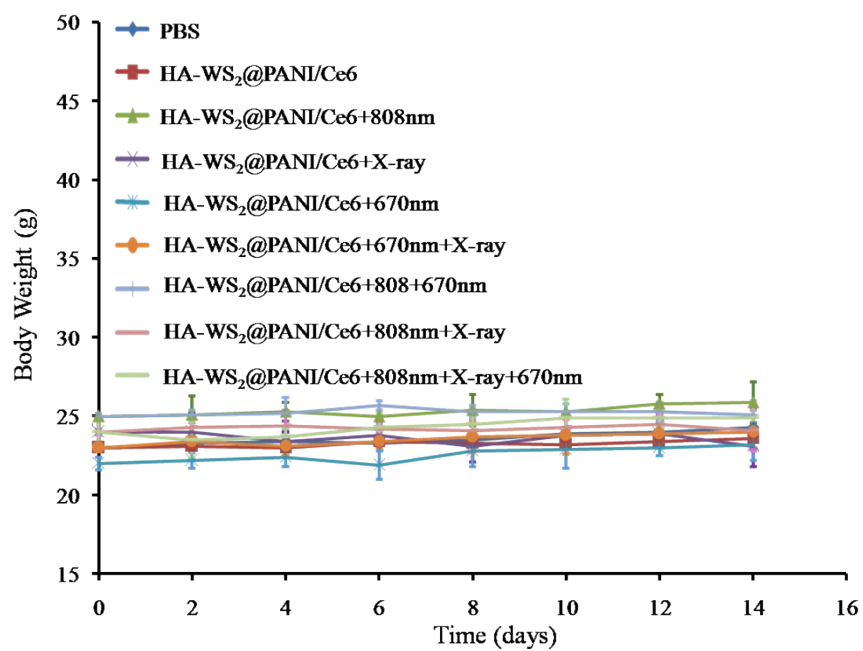

**Fig. S7** Body weights were measured during the 14 day evaluation period in mice under the different conditions. Dates indicate means and standard errors.



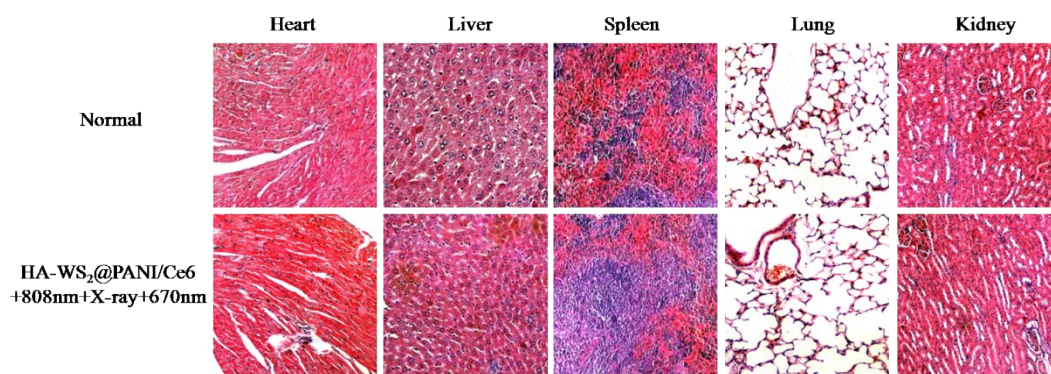

**Fig. S8** H&E-stained major organs collected from normal mice and the mice after treated with HA-WS<sub>2</sub>@PANI/Ce6 nanoparticles exposed to 808nm laser (1.5 W/cm<sup>2</sup>) and X-ray radiation (6 Gy) and 670 nm laser (1 W/cm<sup>2</sup>).

**Table S1**

The stability study of HA-WS<sub>2</sub>@PANI/Ce6 nanoparticles stored at 37 °C for 15 days. Characterization of HA-WS<sub>2</sub>@PANI/Ce6 nanoparticles in PBS and culture medium at 0 day and 15 day.

| Samples                     | Size (nm)  | PDI   | Zeta potential (mV) |
|-----------------------------|------------|-------|---------------------|
| In PBS at 0 day             | 30.1 ± 2.5 | 0.143 | -29.8               |
| In PBS at 15 day            | 32.6 ± 2.2 | 0.209 | -26.6               |
| In culture medium at 0 day  | 30.6 ± 2.1 | 0.156 | -30.2               |
| In culture medium at 15 day | 33.5 ± 2.7 | 0.197 | -26.7               |

Values are presented as the mean ± SD.

**Table S2**

The AUC<sub>0-∞</sub> accumulation of HA-WS<sub>2</sub>@PANI/Ce6 nanohybrids in the major organs and tumors (n = 4).

| Tissue | AUC <sub>0-∞</sub> (ID%·hour) |
|--------|-------------------------------|
| Heart  | 11.8 ± 5.5                    |
| Liver  | 65.7 ± 12.9                   |
| Spleen | 43.1 ± 8.5                    |
| Lung   | 36.8 ± 9.2                    |
| Kidney | 34.9 ± 8.9                    |
| Tumor  | 78.3 ± 9.1                    |
